# Supplementary material
Source: PubMed Central journal article supplement (PMC3090237)

**Supplemental Figure 1.** Affinity-tagged EL (EL-V5-TAP) is active. Homozygous (*clid*) and heterozygous (*het*) mutant cells were transfected with EL-V5-TAP and post-heparin culture media analyzed for lipase activity. Image below graph shows Western blot analysis of culture media with anti-V5 antibody. ND, not detectable.

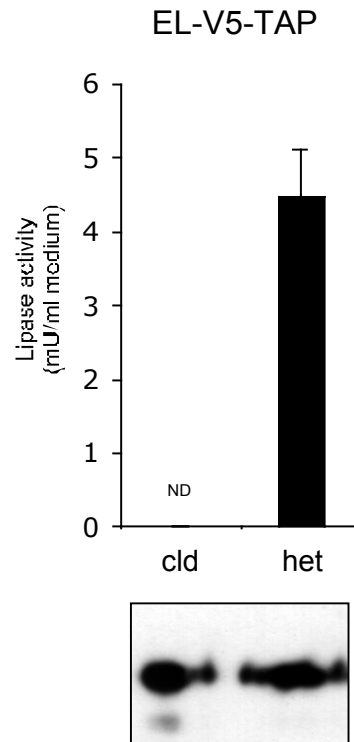

Supplement: supp_M011155_jlr.M011155-1.pdf [file supp_M011155_jlr.M011155-1.pdf]
